# Supplementary material for: Association between EN1 rs4144782 and susceptibility of knee osteoarthritis: A case-control study
Source: PubMed Central journal article supplement (PMC5482684; doi:10.18632/oncotarget.16842), 2017-04-05
Supplement: oncotarget-08-36650-s001.pdf [file oncotarget-08-36650-s001.pdf]

## **Association between EN1 rs4144782 and susceptibility of knee osteoarthritis: A case-control study**

### **SUPPLEMENTARY INFORMATION**

**Supplementary File 1: STROBE Statement. Checklist of items that should be included in reports of observational studies**

See Supplementary File 1

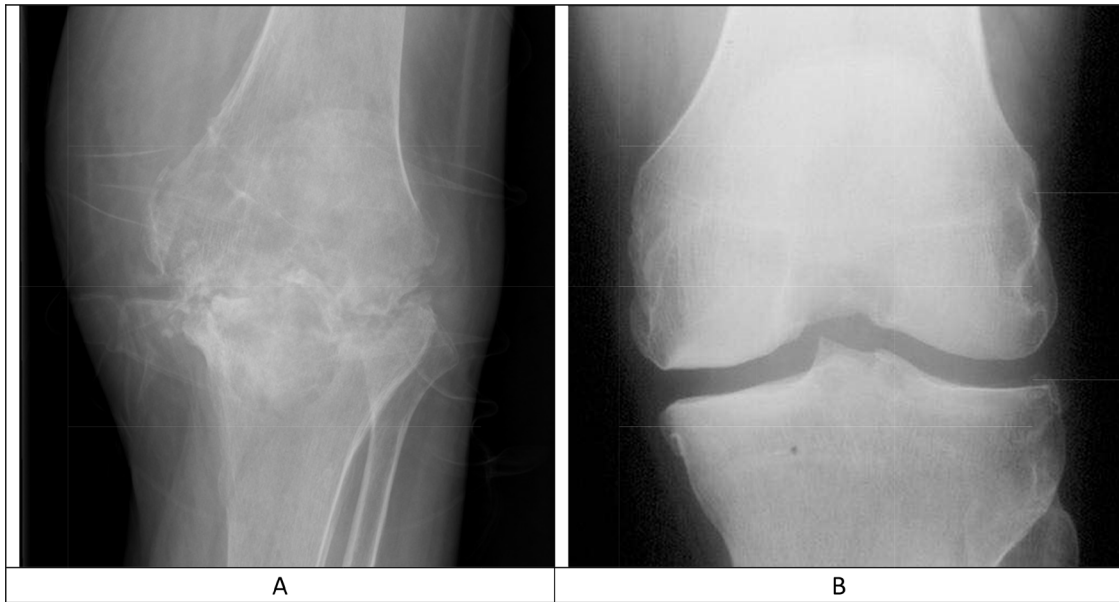

**Supplementary File 2: X – ray of OA case and control. (A) OA case; (B) Control.**
